# Supplementary material for: Environmental Radiofrequency Electromagnetic Fields Exposure at Home, Mobile and Cordless Phone Use, and Sleep Problems in 7-Year-Old Children
Source: PubMed Central journal article supplement (PMC4625083; doi:10.1371/journal.pone.0139869), 2015-10-28
Supplement: pone.0139869.s001.pdf [file pone.0139869.s001.pdf]

**S1 Table: Minimally-adjusted association between RF-EMF exposure sources and those sleeping problems *a priori* hypothesized to be potentially related to RF-EMF exposure**

|                                                                       | Sleeping problems |                |                |                |                  |                |             |                |                    |                |
|-----------------------------------------------------------------------|-------------------|----------------|----------------|----------------|------------------|----------------|-------------|----------------|--------------------|----------------|
|                                                                       | Sleep onset delay |                | Sleep duration |                | Night awakenings |                | Parasomnias |                | Daytime sleepiness |                |
|                                                                       | OR                | (95% CI)       | IRR            | (95% CI)       | IRR              | (95% CI)       | IRR         | (95% CI)       | IRR                | (95% CI)       |
| Environmental RF-EMF exposure from mobile phone base stations at home |                   |                |                |                |                  |                |             |                |                    |                |
| <50th perc.                                                           | 0.00              |                | 1.00           |                | 1.00             |                | 1.00        |                | 1.00               |                |
| 50-90th perc.                                                         | 1.04              | (0.78 to 1.37) | 1.17           | (1.01 to 1.34) | 1.12             | (0.95 to 1.32) | 1.08        | (0.99 to 1.19) | 1.04               | (0.96 to 1.12) |
| >90th perc.                                                           | 0.97              | (0.62 to 1.54) | 1.31           | (1.06 to 1.63) | 0.92             | (0.70 to 1.20) | 0.88        | (0.76 to 1.03) | 0.99               | (0.87 to 1.12) |
| p-val trend                                                           |                   | 0.98           |                | 0.005          |                  | 0.82           |             | 0.78           |                    | 0.71           |
| RF-EMF indoor sources (Cordless phone/Wi-Fi)                          |                   |                |                |                |                  |                |             |                |                    |                |
| None                                                                  | 1.19              | (0.66 to 2.15) | 1.53           | (1.16 to 2.03) | 1.43             | (1.02 to 2.01) | 1.13        | (0.93 to 1.39) | 1.28               | (1.08 to 1.51) |
| WiFi yes, cordless phone no                                           | 1.14              | (0.82 to 1.58) | 0.95           | (0.80 to 1.13) | 1.25             | (1.03 to 1.51) | 1.04        | (0.93 to 1.16) | 1.02               | (0.93 to 1.12) |
| WiFi no, cordless phone yes                                           | 1.19              | (0.72 to 1.98) | 1.09           | (0.84 to 1.41) | 0.92             | (0.67 to 1.25) | 0.96        | (0.81 to 1.14) | 1.00               | (0.86 to 1.15) |
| Both                                                                  | 1.00              |                | 1.00           |                | 1.00             |                | 1.00        |                | 1.00               |                |
| Mobile phone use at age 5                                             |                   |                |                |                |                  |                |             |                |                    |                |
| No use                                                                | 1.00              |                | 1.00           |                | 1.00             |                | 1.00        |                | 1.00               |                |
| less than once per week                                               | 1.02              | (0.76 to 1.35) | 1.17           | (1.01 to 1.34) | 1.14             | (0.97 to 1.34) | 1.09        | (1.00 to 1.20) | 1.04               | (0.97 to 1.13) |
| 1-2 per week                                                          | 1.53              | (0.93 to 2.53) | 1.35           | (1.03 to 1.77) | 0.94             | (0.67 to 1.32) | 0.93        | (0.77 to 1.12) | 1.13               | (0.97 to 1.32) |
| 3 times or more per week                                              | 1.67              | (0.96 to 2.92) | 1.48           | (1.09 to 2.00) | 1.90             | (1.36 to 2.65) | 1.34        | (1.10 to 1.64) | 1.17               | (0.98 to 1.39) |
| p-val trend                                                           |                   | 0.05           |                | 0.001          |                  | 0.002          |             | 0.02           |                    | 0.03           |
| Cordless phone use at age 5                                           |                   |                |                |                |                  |                |             |                |                    |                |
| No use                                                                | 1.00              |                | 1.00           |                | 1.00             |                | 1.00        |                | 1.00               |                |
| less than once per week                                               | 0.96              | (0.65 to 1.42) | 1.05           | (0.85 to 1.29) | 0.81             | (0.64 to 1.02) | 1.05        | (0.92 to 1.20) | 0.93               | (0.83 to 1.04) |
| 1-2 per week                                                          | 0.93              | (0.57 to 1.52) | 1.09           | (0.85 to 1.39) | 0.74             | (0.56 to 1.00) | 1.03        | (0.87 to 1.21) | 0.93               | (0.81 to 1.06) |
| 3 times or more per week                                              | 0.85              | (0.48 to 1.52) | 1.01           | (0.75 to 1.35) | 1.18             | (0.85 to 1.63) | 1.15        | (0.95 to 1.39) | 0.94               | (0.80 to 1.10) |
| p-val trend                                                           |                   | 0.58           |                | 0.83           |                  | 0.57           |             | 0.25           |                    | 0.44           |

Models adjusted for child's sex and age.
