# Supplementary material for: Environmental Radiofrequency Electromagnetic Fields Exposure at Home, Mobile and Cordless Phone Use, and Sleep Problems in 7-Year-Old Children
Source: PubMed Central journal article supplement (PMC4625083; doi:10.1371/journal.pone.0139869), 2015-10-28
Supplement: pone.0139869.s002.pdf [file pone.0139869.s002.pdf]

**S2 Table Minimally as well as fully-adjusted association between mobile phone ownership at age 7 and sleeping problems**

| Mobile phone ownership at age 7 |                    | Sleep onset delay |                | Sleep duration |                | Night awakenings |                | Parasomnias |                | Daytime sleepiness |                |
|---------------------------------|--------------------|-------------------|----------------|----------------|----------------|------------------|----------------|-------------|----------------|--------------------|----------------|
|                                 |                    | OR                | (95% CI)       | IRR            | (95% CI)       | IRR              | (95% CI)       | IRR         | (95% CI)       | IRR                | (95% CI)       |
| no                              | minimally adjusted | 1                 |                | 1              |                | 1                |                | 1           |                | 1                  |                |
| yes                             |                    | 0.46              | (0.21 to 1.00) | 0.78           | (0.56 to 1.09) | 1.19             | (0.83 to 1.69) | 1.17        | (0.96 to 1.42) | 1.12               | (0.95 to 1.33) |
| p-val                           |                    |                   | 0.03           |                | 0.15           |                  | 0.34           |             | 0.13           |                    | 0.17           |
| no                              | fully adjusted     | 1                 |                | 1              |                | 1                |                | 1           |                | 1                  |                |
| yes                             |                    | 0.29              | (0.09 to 0.96) | 0.72           | (0.49 to 1.07) | 0.84             | (0.54 to 1.29) | 1.03        | (0.82 to 1.30) | 1.01               | (0.83 to 1.23) |
| p-val                           |                    |                   | 0.02           |                | 0.10           |                  | 0.43           |             | 0.77           |                    | 0.93           |

Minimally adjusted: model adjusted for child's sex and age. Fully adjusted: model adjusted for maternal educational level, parental financial situation, parental countries of birth, maternal and paternal age, and child's sex, age, and number of siblings.
