# Supplementary material for: Environmental Radiofrequency Electromagnetic Fields Exposure at Home, Mobile and Cordless Phone Use, and Sleep Problems in 7-Year-Old Children
Source: PubMed Central journal article supplement (PMC4625083; doi:10.1371/journal.pone.0139869), 2015-10-28
Supplement: pone.0139869.s003.pdf [file pone.0139869.s003.pdf]

**S3 Table: Minimally-adjusted association between RF-EMF exposure sources and those sleeping problems *a priori* NOT hypothesized to be potentially related to RF-EMF exposure**

|                                                                              | Bedtime resistance |                | Sleep anxiety |                | Sleep disordered breathing |                | Total score |                |
|------------------------------------------------------------------------------|--------------------|----------------|---------------|----------------|----------------------------|----------------|-------------|----------------|
|                                                                              | IRR                | (95% CI)       | IRR           | (95% CI)       | IRR                        | (95% CI)       | IRR         | (95% CI)       |
| <b>Environmental RF-EMF exposure from mobile phone base stations at home</b> |                    |                |               |                |                            |                |             |                |
| <50th perc.                                                                  | 1.00               |                | 1.00          |                | 1.00                       |                | 1.00        |                |
| 50-90th perc.                                                                | 1.21               | (1.02 to 1.42) | 1.15          | (0.99 to 1.34) | 1.05                       | (0.86 to 1.28) | 1.07        | (1.00 to 1.15) |
| >90th perc.                                                                  | 1.03               | (0.79 to 1.34) | 0.95          | (0.74 to 1.21) | 0.75                       | (0.53 to 1.06) | 0.99        | (0.89 to 1.10) |
| p-val trend                                                                  |                    | 0.19           |               | 0.51           |                            | 0.35           |             | 0.39           |
| <b>RF-EMF indoor sources (Cordless phone/Wi-Fi)</b>                          |                    |                |               |                |                            |                |             |                |
| None                                                                         | 1.08               | (0.75 to 1.57) | 0.80          | (0.56 to 1.14) | 1.33                       | (0.86 to 2.04) | 1.19        | (1.02 to 1.38) |
| WiFi yes, cordless phone no                                                  | 1.22               | (1.01 to 1.48) | 1.07          | (0.89 to 1.28) | 1.57                       | (1.25 to 1.97) | 1.03        | (0.95 to 1.12) |
| WiFi no, cordless phone yes                                                  | 1.19               | (0.88 to 1.61) | 0.80          | (0.60 to 1.07) | 1.29                       | (0.90 to 1.85) | 0.97        | (0.85 to 1.09) |
| Both                                                                         | 1.00               |                | 1.00          |                | 1.00                       |                | 1.00        |                |
| <b>Mobile phone use at age 5</b>                                             |                    |                |               |                |                            |                |             |                |
| No use                                                                       | 1.00               |                | 1.00          |                | 1.00                       |                | 1.00        |                |
| less than once per week                                                      | 1.22               | (1.04 to 1.44) | 1.18          | (1.01 to 1.37) | 1.11                       | (0.91 to 1.35) | 1.11        | (1.04 to 1.19) |
| 1-2 per week                                                                 | 1.14               | (0.82 to 1.57) | 0.89          | (0.65 to 1.21) | 0.92                       | (0.61 to 1.40) | 1.11        | (0.97 to 1.26) |
| 3 times or more per week                                                     | 2.15               | (1.52 to 3.03) | 1.49          | (1.07 to 2.07) | 1.23                       | (0.79 to 1.92) | 1.40        | (1.21 to 1.63) |
| p-val trend                                                                  |                    | <0.001         |               | 0.03           |                            | 0.40           |             | <0.001         |
| <b>Cordless phone use at age 5</b>                                           |                    |                |               |                |                            |                |             |                |
| No use                                                                       | 1.00               |                | 1.00          |                | 1.00                       |                | 1.00        |                |
| less than once per week                                                      | 0.94               | (0.74 to 1.19) | 0.90          | (0.73 to 1.12) | 0.96                       | (0.72 to 1.28) | 0.96        | (0.87 to 1.06) |
| 1-2 per week                                                                 | 1.07               | (0.80 to 1.42) | 0.85          | (0.65 to 1.10) | 1.04                       | (0.74 to 1.48) | 0.94        | (0.84 to 1.06) |
| 3 times or more per week                                                     | 1.22               | (0.88 to 1.70) | 1.02          | (0.76 to 1.37) | 1.19                       | (0.81 to 1.77) | 1.02        | (0.89 to 1.18) |
| p-val trend                                                                  |                    | 0.12           |               | 0.87           |                            | 0.29           |             | 0.96           |

Models adjusted for child's sex and age.
